# Supplementary material
Source: MDPI journal article supplement (https://www.mdpi.com/2673-7272/3/2/12)
Supplement: s1 [file s1]

## Supplementary File S1: Search strategy

OVID Medline, Embase and EBM reviews:

| No. | Search terms                                                                                                                                                                                           |
|-----|--------------------------------------------------------------------------------------------------------------------------------------------------------------------------------------------------------|
| 1   | cerebral palsy.mp. OR cerebral palsy/ OR spastic quadriplegia.mp OR spastic tetraplegia.mp.OR spastic quadriplegic.mp. OR spastic tetraplegic.mp.                                                      |
| 2   | gait trainer.mp                                                                                                                                                                                        |
| 3   | "David Hart walker".m.p. OR "David Hart walking orthosis".mp. OR DHWO OR "NF-walker".mp. OR "Norsk Funktion walking orthosis".mp. OR NF-WO.mp. OR "Norsk Funktion walker" OR "NF-walking orthosis".mp. |
| 4   | "support walker".mp.                                                                                                                                                                                   |
| 5   | "walking device*".mp.                                                                                                                                                                                  |
| 6   | "supported walk*".mp.                                                                                                                                                                                  |
| 7   | "supported step*".mp.                                                                                                                                                                                  |
| 8   | "overground gait training"                                                                                                                                                                             |
| 9   | "locomotor training"                                                                                                                                                                                   |
| 10  | 2 OR 3 OR 4 OR 5 OR 6 OR 7 OR 8 OR 9                                                                                                                                                                   |
| 11  | 1 AND 10                                                                                                                                                                                               |

EBSCO Medline and CINAHL

|    |                                                                                                                                                                                                                                                                                                              |
|----|--------------------------------------------------------------------------------------------------------------------------------------------------------------------------------------------------------------------------------------------------------------------------------------------------------------|
| 1  | TI ( "cerebral palsy" or cp or "spastic quadriplegia" or "spastic quadriplegic cerebral palsy" ) OR AB ( "cerebral palsy" or cp or "spastic quadriplegia" or "spastic quadriplegic cerebral palsy" ) OR TI spastic tetraplegia OR AB spastic tetraplegia OR TI spastic tetraplegic OR AB spastic tetraplegic |
| 2  | TI "gait trainer" OR AB "gait trainer"                                                                                                                                                                                                                                                                       |
| 4  | TI "David Hart walker" OR AB "David Hart walker" OR AB "David Hart walking orthosis" OR AB "DHWO" OR TI "NF-walker" OR AB "NF-walker" OR TI "Norsk-Funktion walking orthosis" OR AB "Norsk-Funktion walking orthosis" OR AB "NF-walker orthosis"                                                             |
| 5  | TI "support walker" OR AB "support walker"                                                                                                                                                                                                                                                                   |
| 6  | TI "walking device*" OR AB "walking device*"                                                                                                                                                                                                                                                                 |
| 7  | TI "supported walk*" OR AB "supported walk*"                                                                                                                                                                                                                                                                 |
| 8  | TI "supported step*" OR AB "supported step*"                                                                                                                                                                                                                                                                 |
| 9  | TI "overground gait training" OR AB "overground gait training"                                                                                                                                                                                                                                               |
| 10 | TI "locomotor training" OR AB "locomotor training"                                                                                                                                                                                                                                                           |
| 11 | 2 OR 3 OR 4 OR 5 OR 6 OR 7 OR 8 OR 9 OR 10                                                                                                                                                                                                                                                                   |
| 12 | 11 AND 1                                                                                                                                                                                                                                                                                                     |

PEDro

|   |                                 |
|---|---------------------------------|
| 1 | Gait trainer AND cerebral palsy |
| 2 | supported stepping              |
| 3 | Support walker                  |
| 4 | walker and cerebral palsy       |

Google Scholar

|   |                                       |
|---|---------------------------------------|
| 1 | Gait trainer and cerebral palsy       |
| 2 | supported stepping and cerebral palsy |
| 3 | supported walking and cerebral palsy  |
| 4 | support walker and cerebral palsy     |
| 5 | "walking device" and cerebral palsy   |
| 6 | "David Hart walker"                   |
| 7 | "NF-walker" cerebral palsy            |
| 8 | Hart walker cerebral palsy            |
| 9 | "wheeled walker" "cerebral palsy"     |
